# Supplementary material
Source: publisher figshare collection journal article supplement (https://sage.figshare.com/ndownloader/files/17615294)
Supplement: Supplementary file 1 [file 17615294]

## Appendix A- Supplementary Materials

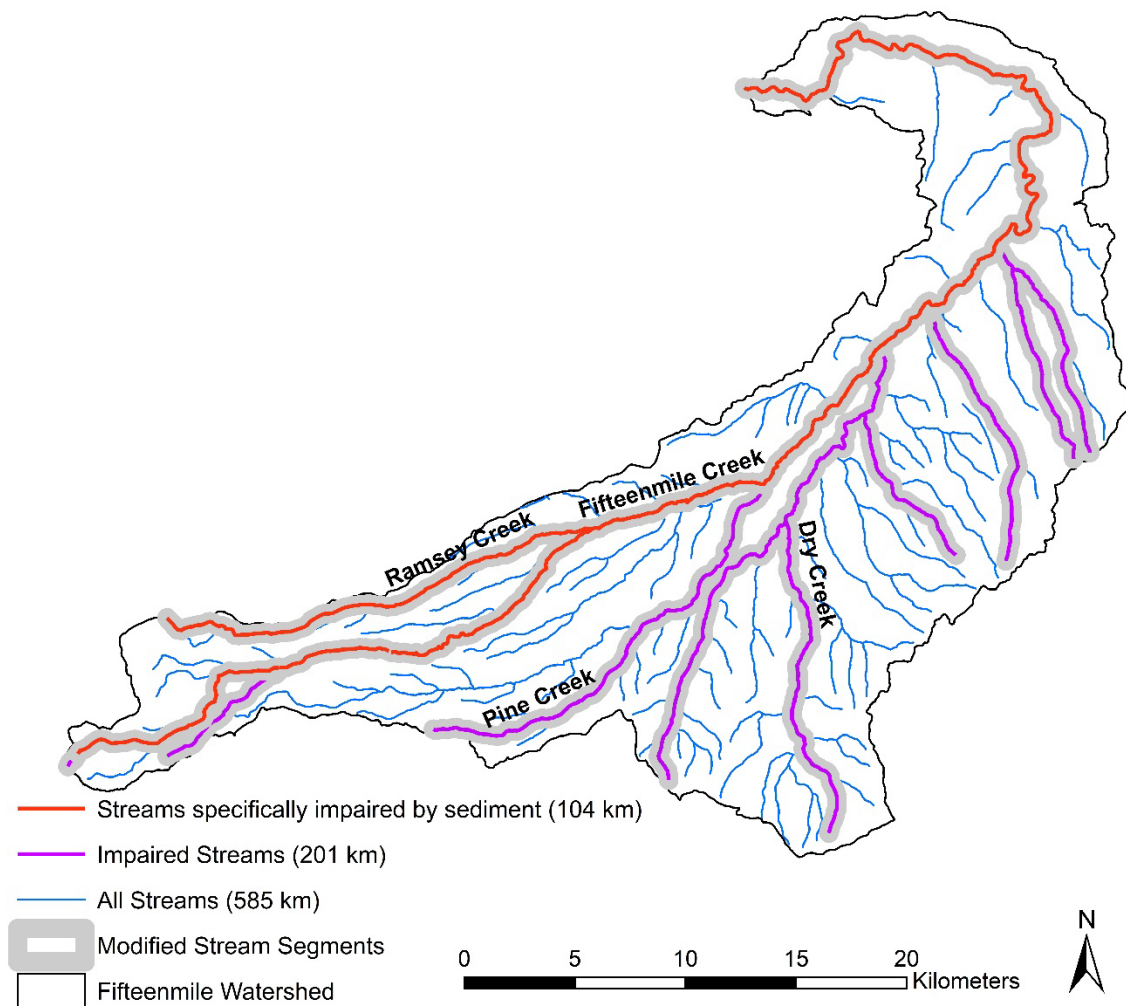

Figure A.1 Locations of impaired streams and modified streams in the Fifteenmile watershed.
